## A Sincere Thank You to the Reviewers of *Clinical Diabetes*

Each year, *Clinical Diabetes* calls on many scientific and medical experts in the field of diabetes to critically review submitted manuscripts. The journal's editors and staff sincerely appreciate these reviewers, whose valuable feedback helps to ensure the high quality of the research and review articles published in each issue. We would like to take this opportunity to publicly thank all of the reviewers who have volunteered their time and expertise in the past year (1 November 2022 to 31 October 2023) for their contributions to *Clinical Diabetes*.

|                          |                       |                   |                       |
|--------------------------|-----------------------|-------------------|-----------------------|
| Sumera Ahmed             | Christina Dietz       | Louis Kuritzky    | Harikrishnan Prasad   |
| Burcu Akbaba             | Osagie Ebekozien      | Pamela Kushner    | David Quillen         |
| Adeola Akindana          | Michael Edmonds       | Rayhan Lal        | Klaus Rave            |
| Charles Alexander        | Satheesh Elangovan    | Seung-Pyo Lee     | Paris Roach           |
| Lina Alkhaled            | Filippe Falcao-Tebas  | Sheyu Li          | Lauren Roberson       |
| John Anderson            | Gil Genuth            | Yuliya Lokhnygina | Leopold Schmetterer   |
| Nay Linn Aung            | Jeremy Gilbert        | Gayle Lorenzi     | Doron Schneider       |
| Sonia Bahroo             | Jennifer Goldman      | Helen Lunt        | Viral Shah            |
| Joshua Barzilay          | Jennifer Goldstein    | Melissa Magwire   | Sara Shahdoost        |
| Christine Beebe          | Uma Gunasekaran       | Christine March   | Moghadam              |
| Cari Berget              | Amber Healy           | Ryan McDonough    | Michael Shannon       |
| Michael Bergman          | Michael Heile         | Alexis McKee      | Karen Shidler         |
| Julia Blanchette         | Debbie Hinnen         | Graydon Meneilly  | Mansur Shomali        |
| Jesus Blanco             | Philip Home           | Eden Miller       | Jay Shubbrook         |
| David Boyer              | Byron Hoogwerf        | Enrique Montero   | Lance Sloan           |
| Kathaleen Briggs Early   | Vidhya Illuri         | Benjamin Moore    | Denise Small          |
| Amy Butts                | Diana Isaacs          | Pablo Mora        | Jannet Svensson       |
| Lisa Chacko              | Henry Jansen          | Joy Moverley      | Ronald Tamler         |
| Alice Cheng              | Eric Johnson          | Brandon Nathan    | Xavier Vela           |
| Belinda Childs           | Jeremy Johnson        | Joshua Neumiller  | Venugopal Vijayakumar |
| Maria Vittoria Cicinelli | Jennifer Jones        | Cheyenne Newsome  | Deshira Wallace       |
| MarieElena Cordisco      | Udaya Kabadi          | Sean Oser         | Jana Wardian          |
| Carlos Cosentino         | Anna Kasper           | David Oyer        | Sara Wettergreen      |
| Kevin Cowart             | Daniel Katselnik      | Cesar Palerm      | John White            |
| Jill Crandall            | Erwin Klein Woolthuis | Malinda Peeples   | Neil White            |
| Stephanie Crossen        | Venkata Kodali        | Charles Peterson  | Darrell Wilson        |
| Patricia Davidson        | Jason Konopack        | Kevin Peterson    | Eugene Wright         |
| Nora Denisova            | Karmeen Kulkarni      | Kim Pfothhauer    | Carol Wysham          |

<https://doi.org/10.2337/cd24-en01>

©2024 by the American Diabetes Association. Readers may use this article as long as the work is properly cited, the use is educational and not for profit, and the work is not altered. More information is available at <https://www.diabetesjournals.org/journals/pages/license>.
